# Supplementary material for: Preparation, Cytotoxicity, and In Vitro Bioimaging of Water Soluble and Highly Fluorescent Palladium Nanoclusters
Source: MDPI journal article supplement (doi:10.3390/bioengineering7010020), 2020-02-21
Supplement: s1 [file s1]

## Supporting information

# Preparation, Cytotoxicity and *In vitro* Bioimaging of Water Soluble and Highly Fluorescent Palladium Nanoclusters

Suresh Thangudu<sup>1</sup>, Poliraju Kalluru<sup>2</sup> and Raviraj Vankayala<sup>3\*</sup>

<sup>1</sup> Department of Chemistry, National Tsing Hua University, Hsinchu, Taiwan.

<sup>2</sup> Department of Chemistry, University of Calgary, Alberta, Canada.

<sup>3</sup> Department of Bioscience and Bioengineering, Indian Institute of Technology Jodhpur, Jodhpur, Rajasthan, India.

\*Correspondence: [rvankayala@iitj.ac.in](mailto:rvankayala@iitj.ac.in)

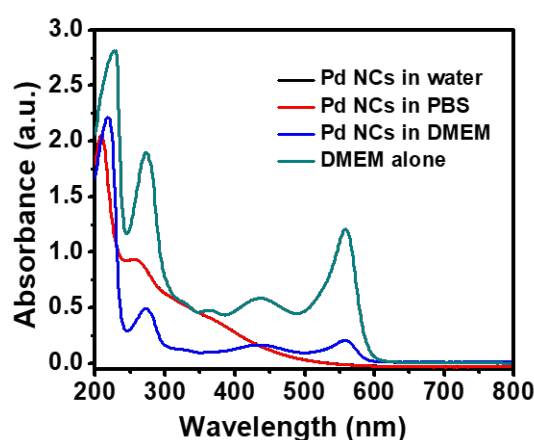

Figure S1. Absorption spectra of Pd NCs in various biological media medium.

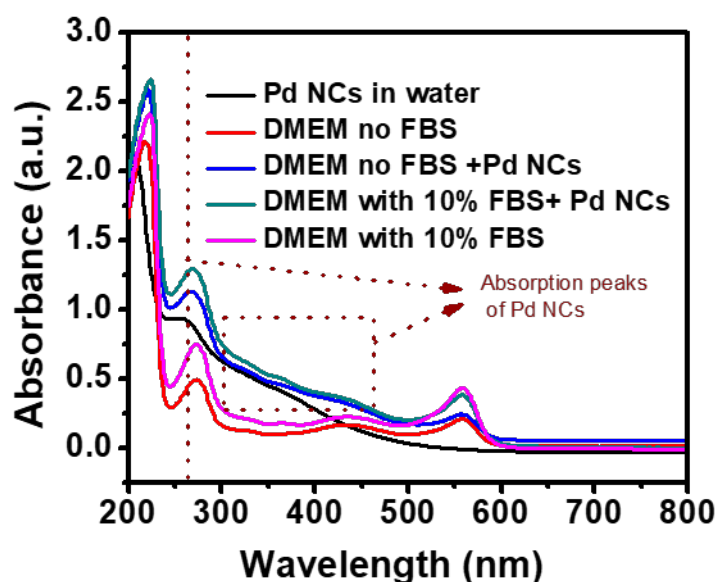

Figure S2. Stability of Pd NCs in DMEM cell culture medium with and without 10% FBS.
